# Supplementary material
Source: PubMed Central journal article supplement (PMC5603303)
Supplement: NIHMS902827-supplement-Appendix__Mobile_Technology_and_Health_Survey_Instrument.pdf [file NIHMS902827-supplement-Appendix__Mobile_Technology_and_Health_Survey_Instrument.pdf]

# Appendix. Mobile Technology and Health Survey Instrument

The survey was printed on both sides and folded in half to distribute it as a “booklet”.

**PART 4: Your use of other health technologies**

19. Doctors often give patients papers with information. With cell phones, doctors or nurses could give you a video to watch or an app to use instead of papers to read. How helpful would it be for your doctor to give you information through your phone?

Very helpful  
 Helpful  
 A little bit helpful  
 Not helpful at all

20. Some people communicate with their doctor or clinic through a “patient portal” on the internet (like MyChart or E-care). Does your clinic have a patient portal?

Yes  
 No (Go to 21)  
 I don't know (Go to 21)

20a. Do you use the patient portal?

Yes  
 No

21. If you were using a patient portal or health app on your phone, how comfortable would you feel entering private information if:

a. Your doctor could see your information?

Very comfortable  
 Comfortable  
 Uncomfortable  
 Very uncomfortable

b. The information is stored by a third party (like a website or company that is not part of your doctor's office)?

Very comfortable  
 Comfortable  
 Uncomfortable  
 Very uncomfortable

Comments: \_\_\_\_\_

## Mobile Technology and Health

This clinic is doing a research study with the University of Washington.

This survey will ask you about how you may use a cell phone to manage your health. Your answers, taken with other responses, will help your clinic provide better care to patients.

- The survey should take less than 5 minutes to fill out.
- Your answers are anonymous, which means that they cannot be traced back to you in any way.
- Your doctors and nurses will not see your answers.
- Taking part in this survey is up to you. It is voluntary. You do not have to answer any questions you do not want to answer.

**DO NOT FILL OUT THE FORM IF:**  
**(1) You are 17 years old or younger**  
**(2) You have already filled out this form**

**PART 1: You and your phone**

1. Do you have a cell phone... or a Blackberry, iPhone or other device that is also a cell phone?

Yes  
 No (Go to PART 3)

2. Some cell phones are called “smartphones” because of certain features they have. Is your cell phone a smartphone, such as an iPhone, Android, Blackberry or Windows phone?

Yes  
 No (Go to PART 3)

3. Have you ever used your phone to:

Find health or medical information  
 Download or use a health “app”

*Check all that apply.*  Track or manage a health issue (your diet or weight, activity, mood, blood pressure, etc.)  
 None of these (Go to PART 3)

3a. How often do you use your phone for these health reasons?

Once a month or less  
 2 or 3 times a month  
 1 to 6 times a week  
 Once a day or more

Site ID: \_\_\_\_\_

**Next Page** →

**When you finish the survey,  
please put it in the yellow drop box  
by the front desk.**

**Thank you!**

If you have questions about this research study, please contact \_\_\_\_\_, (XXX) XXX-XXXX, \_\_\_\_\_, XXXXXX@XXX.XXX




**PART 2: How you use your phone**

4. How did you learn about the mobile health apps you have used?

My doctor or clinic  
 Friend or family  
 Website or internet  
 Flier, mail or other ad  
 Other: \_\_\_\_\_

5. What is the name of the most useful health “app” you have used?

5a. What does the app do that is useful for you?

6. Have you tried any health apps that you stopped using after just a short time?

Yes  
 No (Go to 7)

6a. If yes, why did you stop using it?

Problem with login / password  
 Didn't do what you wanted  
 Took too much time to use  
 Other: \_\_\_\_\_

7. How important is it for your primary care provider to know about the health app(s) you use?

Very important  
 Important  
 A little bit important  
 Not at all important

8. Has your doctor ever recommended a health app for you?

Yes  
 No (Go to 9)

8a. What is the name of the app? \_\_\_\_\_

8b. Was it helpful for you?

Yes  
 No

9. How useful would the following features be for you to have on your phone?

|                                                 | Least Useful             | 0                        | 1                        | 2                        | 3                        | 4                        | 5                        | Most Useful              |
|-------------------------------------------------|--------------------------|--------------------------|--------------------------|--------------------------|--------------------------|--------------------------|--------------------------|--------------------------|
| a. General health information                   | <input type="checkbox"/> |
| b. Appointment reminders                        | <input type="checkbox"/> |
| c. Medication reminders                         | <input type="checkbox"/> |
| d. Get feedback on how I'm doing                | <input type="checkbox"/> |
| e. Tell my doctor how I'm doing                 | <input type="checkbox"/> |
| f. Track progress (mood, weight, etc.)          | <input type="checkbox"/> |
| g. Help with stress management or coping        | <input type="checkbox"/> |
| h. Help me change a habit (diet, smoking, etc.) | <input type="checkbox"/> |
| i. Tell my friends/family how I'm doing         | <input type="checkbox"/> |
| j. Support group / social network               | <input type="checkbox"/> |
| k. Other feature (describe: _____)              | <input type="checkbox"/> |

**PART 3: You and your health**

10. How old are you? \_\_\_\_\_ years

11. Are you:

Male  
 Female

12. What is your race and ethnicity? *Check all that apply.*

American Indian / Alaska Native  
 Black or African American  
 White (not Hispanic or Latino)  
 Other: \_\_\_\_\_

Asian  
 Pacific Islander  
 Hispanic or Latino

13. Do you have any of these health conditions? *Check all that apply.*

High blood pressure  
 Heart disease  
 None of these  
 Diabetes  
 Depression  
 Other: \_\_\_\_\_

Asthma  
 Chronic pain

14. Over the last 2 weeks, how often have you been bothered by little interest or pleasure in doing things?

Not at all  
 Several days  
 More than half the days  
 Nearly every day

15. Over the last 2 weeks, how often have you been bothered by feeling down, depressed, or hopeless?

Not at all  
 Several days  
 More than half the days  
 Nearly every day

***If you are experiencing these symptoms, please tell your doctor.***

16. How confident are you filling out medical forms by yourself?

Extremely confident  
 Quite a bit confident  
 Somewhat confident  
 A little bit confident  
 Not at all confident

17. How often do you have problems learning about your medical problems because of difficulty understanding written information?

Always  
 Often  
 Sometimes  
 Occasionally  
 Never

18. How often do you have someone like a family member, friend, caregiver, or a hospital or clinic worker help you read clinic or hospital materials?

Always  
 Often  
 Sometimes  
 Occasionally  
 Never

**Next Page** →
